# Supplementary material for: Metformin protects trabecular meshwork against oxidative injury via activating integrin/ROCK signals
Source: eLife journal article supplement (doi:10.7554/elife.81198), 2022-12-12

Figure 5-source data2 integrin

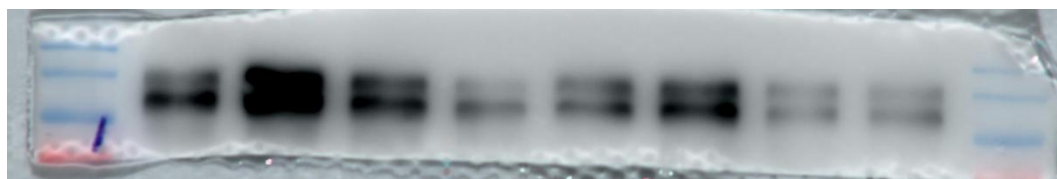

Figure 5-source data3 ROCK 1/2

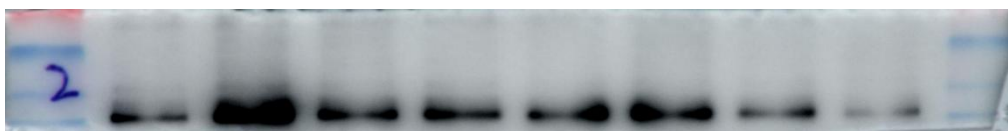

Figure 5-source data4 AMPK

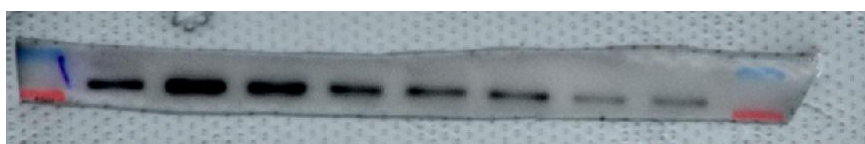

Figure 5-source data5 pAMPK

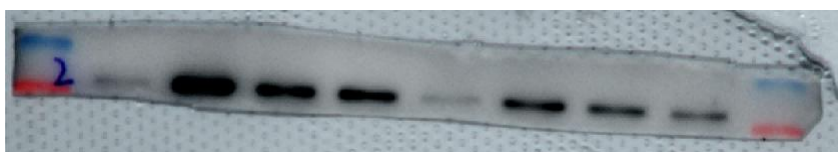

Figure 5-source data6 MLC 1

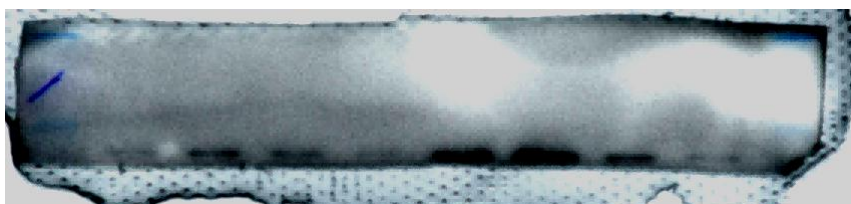

Figure 5-source data7 F-actin

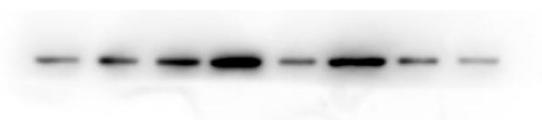

Figure 5-source data8  $\beta$ -actin

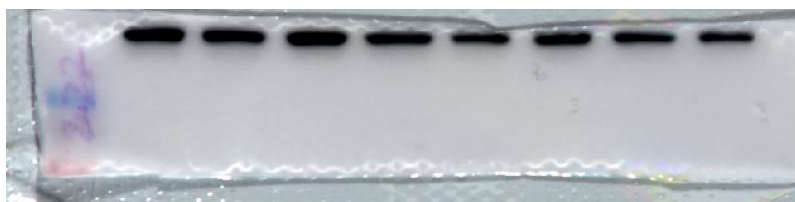

Supplement: data1 [file elife-81198-data1-v1.zip]
