# Supplementary material for: Metformin protects trabecular meshwork against oxidative injury via activating integrin/ROCK signals
Source: eLife journal article supplement (doi:10.7554/elife.81198), 2022-12-12
Supplement: data1 [file Figure supplement1-source data1.xlsx]

## Sheet: Sheet1
postive DCF cells
CON	MET 3	DEX	DEX+MET 3	DEX+MET 5	DEX+MET 10
3.92157	2.22222	14	15	2	2.27273
3.38983	2	7.31707	6.89655	5.17241	4.34783
4.12121	5.94175	23.7288	7.69231	6.66667	0
6.25	3.90909	20.4546	7.14286	7.84314	4.25532
3.77359	3.7037	25.4237	9.09091	4.91803	3.77359
6.25		20.8333
		24
