# Supplementary material for: Metformin protects trabecular meshwork against oxidative injury via activating integrin/ROCK signals
Source: eLife journal article supplement (doi:10.7554/elife.81198), 2022-12-12
Supplement: data1 [file Figure1- source data2.xlsx]

## Sheet: Sheet1
GROUP	PBS-1	PBS-2	PBS-3	PBS-4	PBS-5	DEX-1	DEX-2	DEX-3	DEX-4	DEX-5	DEX-6	DEX-7	DEX-8	DEX-9	DEX-10	DEX-11	DEX-12	DEX-13	DEX-14	DEX-15	DEX-16	DEX-17	DEX-18	DEX-19	DEX-20
baseline	21.46	21.3	21.52	21.68	20.22	20.75	21.9	22.04	21.61	21.55	21.74	21.28	21.75	21.55	22.38	22.23	21.36	21.81	21.25	21.85	21.87	20.93	21.51	21.48	21.89
D7	21.86	21.85	23.39	21.26	22.65	19.37	20.64	21.67	20.98	21.49	21.56	21.11	19.88	20.43	21.98	21.54	20.83	21.5	21.05	21.36	20.94	20.74	20.77	21.5	21.01
D14	23.16	21.98	22.79	21.71	22.2	18.63	20.3	21.2	19.93	20.83	21.25	20.64	19.22	20.21	21.45	21.09	20.48	21.14	20.58	20.71	21.65	20.22	20.89	21.8	21.53
D21	22.77	21.85	22.85		22.19	18.19	19.07	20.38	19.16	20.06	20.48	18.68	19.79	18.99	20.57	20.25	19.73	19.99	20.46	20.7	20.74	20.18	20.17	21.64	20.74
D28	22.96	21.16	22.47		22.01	18.33	19.05	19.08	19.79	19.79	20.43	19.67	18.16	19.26	20.27	19.3	19.7	19.3	19.85	20.31	20.47	19.9	19.54	21.55	20.33
