# Supplementary material for: Metformin protects trabecular meshwork against oxidative injury via activating integrin/ROCK signals
Source: eLife journal article supplement (doi:10.7554/elife.81198), 2022-12-12
Supplement: data1 [file Figure1-source data3.xlsx]

## Sheet: Sheet1
positive α-SMA%
Veh	DEX
19.1781	25
7.57576	12.1622
8.42105	20.3125
	29.4872
	22.2222
	19.3548
