# Supplementary material for: Metformin protects trabecular meshwork against oxidative injury via activating integrin/ROCK signals
Source: eLife journal article supplement (doi:10.7554/elife.81198), 2022-12-12
Supplement: data1 [file Figure1-source data4.xlsx]

## Sheet: Sheet1
positive TGF-β%
Veh	DEX
0	1.7094
0	0
3.61446	0
	0
	0
	0
	1.25
