# Supplementary material for: Metformin protects trabecular meshwork against oxidative injury via activating integrin/ROCK signals
Source: eLife journal article supplement (doi:10.7554/elife.81198), 2022-12-12
Supplement: data1 [file Figure2-source data1.xlsx]

## Sheet: Sheet1
GROUP	PBS-1	PBS-2	PBS-3	PBS-4	PBS-5	PBS-6	PBS-7	PBS-8	DEX+stop 1	DEX+stop 2	DEX+stop 3	DEX+stop 4	DEX+stop 5	DEX+stop 6	DEX+stop 7	DEX+stop 8	DEX+stop 9	DEX+stop 10	DEX+PBS1	DEX+PBS2	DEX+PBS3	DEX+PBS4	DEX+PBS5	DEX+PBS6	DEX+PBS7	DEX+PBS8	DEX+MET	DEX+MET	DEX+MET	DEX+MET	DEX+MET	DEX+MET	DEX+MET	DEX+MET	DEX+MET	DEX+MET	DEX+MET	DEX+MET	DEX+MET	DEX+MET	DEX+MET	DEX+MET	DEX+MET	DEX+MET
Baseline	13.3333	13.6667	13.3333	14.3333	12.3333	13.3333	14	11.3333	13.7	12	13.7	13	13.7	13.7	14.3	13	14	11.7	12.7	12.3	13.3	13	13.3	13.3	13.3	14	12	13.3	12.7	12.7	12.7	12.3	12.3	13.3	13.3	13	13	12.3	13	12.3	14	13.3	14	12
D2	13.3333	11.6667	13	13	12.6667	13.3333	13.6667	13.3333	15	14.7	14	13.7	12	13.7	13	13.7	13.3	13	14	13.3	15	15	13.3	14	13.3	13.7	12.7	13	12	12	12.3	13	12	12.3	12.7	11.7	13	14.3	12.7	13.7	14.3	14	14.3	13
D5	13.3333	13	12.6667	12.6667	12	12	14	13	13	15	14.7	16	14.7	15	13.3	14.3	14	14	14	14	14.3	14	13	15	13.3	14.3	15	15.3	13	13.7	14	14.3	14.7	15	13	14	14	14	14.3	14.3	14.7	14.3	13.3	14.7
D7	14.3333	12.3333	12.3333	12.3333	13	13.6667	14.3333	14.3333	15	15.3	14	14.3	15	15.3	14.7	13.3	14.3	15.7	15	15	13.3	13.7	12.7	14.3	14.3	14	14.7	16	13.7	11.3	15	14	15	14	13	13.3	11	10.7	12.7	12.3	15.3	16.3	16.3	15
D9	12.3333	14.3333	13.3333	14	15	13	11.3333	14.3333	13.7	14.3	15	13.7	14.7	14	15.3	16	15.7	15.7	13.3	13.3	14.7	14	16.7	16	15	13.7	15.7	16	16	14	15.3	13.3	15	16.3	15	16	16	15	14.7	14	14.3	14.7	15.3	15
D12	14.6667	13.3333	13.6667	11	14.3333	13.3333	13.3333	13.6667	17	15	14	13	15	15	15	15	15.3	15	15	15.7	13.3	16	15	14.7	16	16	16	16	14.7	15	16.3	16.7	16.7	16.3	14	16	13	16.7	15.7	14	14.7	15	14.7	15.3
D14	14.6667	13.3333	14.3333	15	14.6667	14.6667	13	14.6667	16	17.3	17	16.3	16.3	15.7	17	15.3	16.7	15.7	16	16	15.7	16.7	14	14	17.3	15.3	15.3	15	16	17.3	14.3	14	18.3	16.7	15.3	15	14	14.7	16	16	16	14	16.7	18
D16	14	14.6667	14	11.6667	14.3333	14.3333	14	14.3333	16.3	16	17	16	16.7	15.7	17	17.3	16.3	17	17.7	17	16	16	18.3	16.7	15	16	17	16.3	16.7	16	16	15.3	18.3	16	13	14.3	17.3	17	18	17.7	15.7	14	17	16
D19	14.3333	13.6667	14.6667	13.6667	13.3333	15	15.3333	13.6667	16	17.7	16	16	16	16.7	16		15	15	16	15	16.7		16	16	15.3	16	16.3	17	15	14.7	17	17	18.3	17.7	15	16	17.3	18	18	17	18.3	17.3	16.3	15
D21	12.6667	14.3333	14	15	15.6667	13.6667	13.6667	14.6667	16.3	16.3	15.7		17.3	15.3	16.7	18	17.7	17.7	16.3		16.7	16.7	16	15.3	15.3		18.19	15.7	17.3	16.3	15.3	17	17.3	16	17.3	18	17	16.3	16	15	15.3	17.3	17.3	18.3
D23	14	13.6667	14	14.6667	13	14	14	13.3333	16	16.7	17.7	18.3	16.3	16.3	16.7	17	15.3	16.3	15	15	16.3	15	17	16.3	17	17	17	18	17	16.3	16	17	17.3	16.7	17	15.3	16.3	15	16	15.7	16	16.7	17	17
D26	14	12.6667	14.3333	15.3333	15	15	16	15	17	18.3	16.3	17	15.3	15.3		15.7	17	16.7	16.3	19	15.7	16.3	18.3	18	17	17.3	15.3	16.3	17.3	17.7	16.3	16.3	18	16.7		16.7	16.3	17	17.7	17	16.3	16.7	17	16.7
D28	15	15	14	16	15	14.6667	13	12.6667	19	17.3	17	15.7	16.7	15.7	17.3	16	17.7	16.7	16.3	16.7	17	17	19.85	17	17.3	17	17.3	18.7	18.7	17.3	17	17	16.7	16.3	16.7	17.7	16.7	16	16.7	18	17.3	16	16	17
D31	13	15	14	13.7	15	14	13.3	14.7	16.7	17.3	16.3	16	17.7	16.3	17.7	16.7	17	16	16.3	16.7	16	17	17.3	15.3	16.7	17.3	16.3	16.7	16.7	15.7	17	16.3	17.7	16	18.3		16.7	16	16.7	17	16.3	16.7	16.3	16.3
D33	14.3	14.7	14.7	14	14.3	14	14	15	16	16.3	16	17.3	17	17	18.3	18.3	17.7	17.7	18.3	17	17.3	18.3	17	15.7	18.3	19	15	16	16	15	15	16	16	16	17	17	16.3	16.7	14	15.3	15.7	16.7	16	17.3
D35	16	16	13	13.7	15	14	13.3	13.7	16.3	17	18	16.3	15.7	16	17.7	17	16	16	16.7	17.7	17	17.3	17.7	16.7	15.3	15	14.7	15	15.3	15	15.7	14.3	14.7	14.3	16	15.3	15	14.7	17.3	15	15.7	15	16.3	14.7
D38	15.3	14.3	14.3	14	14.3	14	14.3	15	16.3	16.3	16	16	15.7	15.7	15.3	15.7	16.3	17.3	16	17	18	17.7	17.7	18	17	18	17	16	16.3	16	14	14	14	13	15.7	15	15.7	15	15.3	15	15.7	15	14.3	15
D40	14	15	14.7	14	15.3	14	14	14.7	17	16	17.3	17.7	16.7	16.3	16	16.7	17.7	16.7	17	16.7	17.7	16.3	16	17	16	16.7	15	16.3	15.3	15.7	15.7	16	15.3	15.3	14.7	15	14.7	15	15.7	17	14.7	15	16	16
D42	14	14.7	14.3	14.3	14.3	14.3	14.7	15	16	16.7	16.7	16.7	18	18	17	17	17.7	16	17.3	18	18.7	17.3	17	16.7	17.3	17.7	15.7	16.3	15	15.3	16.3	15	16.3	16.7	15	15.3	16	16.3	14.3	14.7	15.3	14.7	16.7	17
D45	14.7	16.3	15.3	13.7	13.7	13.7	13.7	13.7	16	16.3	16	16	16	16	17	16.3	16	15.3	17.3	16.7	16.3	16.3	16.3	17.7	18.3	17.7	16	16.7	15.3	15.3	14.3	15	15.3	15.7	15	15	15.7	16	17	17.7	16.7	13	15	15.3
D49	14	13	14	14	15	14	14	15	15	14.3	17	16	16	14.3	16.3	15	15	15.7	16	17.7	16.7	17	16	15.7	16	14.7	15.7	15	15	17	15.7	16.3	15.7	15	15.7	16.3	15.3	16.3	16.7	15.7	13	15.3	15.3	15.7
D52	14.7	14.7	14	14	14.3	14.7	14	15.3	16.3	14	16	15.3	15	16.3	14.7	15.3	15.7	14	16.3	16.7	15.7	16.3	16	16.8	16.8	15	15	15	16	15.7	15.7	15	15	14.7	14.7	14.7	15.3	16	16	16.3	15.7	15.7	15.7	14.7
D56	14	14.3	15.3	14.3	14.7	14.3	14.7	15	15.7	16	15.3	15.7	16.7	16	14.3	15	15	15.7	17	18	16	17	16.3	16	17	16	14	16	15.7	16	15	15	15	15	15	15.7	14.7	15.3	15	14.7	15	15.3	15	15.7
