# Supplementary material for: Metformin protects trabecular meshwork against oxidative injury via activating integrin/ROCK signals
Source: eLife journal article supplement (doi:10.7554/elife.81198), 2022-12-12
Supplement: data1 [file Figure3-source data1.xlsx]

## Sheet: Sheet1
positive α-SMA%-2W
group1	group 2	group 3	group 4
18.8235	12.8205	24.2857	4.7619
7.54717	21.7391	19.6429	12.1622
7.44681	19.5122	13.4615	21.8391
13.9535	22.2222	22.2222	21.25
8.95522		64.8148	8.06452
			1.78571
			13.8614
			7.52688
