# Supplementary material for: Metformin protects trabecular meshwork against oxidative injury via activating integrin/ROCK signals
Source: eLife journal article supplement (doi:10.7554/elife.81198), 2022-12-12
Supplement: data1 [file Figure3-source data2.xlsx]

## Sheet: Sheet1
positive TGF-β
group1	group 2	group 3	group 4
2.5974	4	2.13457	3.94737
4.34783	0	1.5873	2.04082
0	0	6.95522	1.88679
	0		0
			0
