# Supplementary material for: Metformin protects trabecular meshwork against oxidative injury via activating integrin/ROCK signals
Source: eLife journal article supplement (doi:10.7554/elife.81198), 2022-12-12
Supplement: data1 [file Figure3-source data3.xlsx]

## Sheet: Sheet1
positive FN
group1	group 2	group 3	group 4
30.9524	30.6931	50	20.548
37.5	30.7792	40.2597	15.1515
25.7143	21.4286	23.5955	15.2941
	45.5675	34.6667	26.5625
			8.33333
