# Supplementary material for: Metformin protects trabecular meshwork against oxidative injury via activating integrin/ROCK signals
Source: eLife journal article supplement (doi:10.7554/elife.81198), 2022-12-12
Supplement: data1 [file Figure3-source data4.xlsx]

## Sheet: Sheet1
positive F-actin
group1	group 2	group 3	group 4
6.57895	2.73973	0	5.76923
9.58904	0	1.81818	16.9014
7.14286	0	3.75	9.23077
3.7037	3.57143		9.375
3.77359			9.09091
