# Supplementary material for: Metformin protects trabecular meshwork against oxidative injury via activating integrin/ROCK signals
Source: eLife journal article supplement (doi:10.7554/elife.81198), 2022-12-12
Supplement: data1 [file Figure4-source data1.xlsx]

## Sheet: Sheet1
CON	MET1	MET3	MET5	MET10	MET20	MET30	MET40	MET50
100		67.3			49.4	54.3	34.5	16.9
100		66.1	47.7	68.6	59.2	50.6	35.4	49.7
100	94.2	62	83.2	94.3	67.1	59.9	59.7	52.3
100	91.5	77.8	86.3	89.6	82.1	74.7	85.6	73.9
100	94.5	82.8	84.7	82.8	80.4	75.8	67.9	60.1
100	108	102	98.1	98.1	90.7	85.1	66.2	53.8
100	96.4	98.6	91.5	86	73.7	64.6	38.2	47.7
