# Supplementary material for: Metformin protects trabecular meshwork against oxidative injury via activating integrin/ROCK signals
Source: eLife journal article supplement (doi:10.7554/elife.81198), 2022-12-12
Supplement: data1 [file Figure4-source data2.xlsx]

## Sheet: Sheet1
CON	tBHP	tBHP+MET3	tBHP+MET5	tBHP+MET10
100	77.4	77.7	79.2	63
100	73.8	79.2	83.1	68.3
100	49	82.9	76.5	82.5
100	79.3	87.3	79.2
100		83.6	74.8
100
