# Supplementary material for: Metformin protects trabecular meshwork against oxidative injury via activating integrin/ROCK signals
Source: eLife journal article supplement (doi:10.7554/elife.81198), 2022-12-12
Supplement: data1 [file Figure5-source data1.xlsx]

## Sheet: Sheet1
	Control	Control	Control	Control	MET3	MET3	MET3	MET3	MET5	MET5	MET5	MET5	MET10	MET10	MET10	MET10	tBHP	tBHP	tBHP	tBHP	tBHP+MET3	tBHP+MET3	tBHP+MET3	tBHP+MET3	tBHP+MET5	tBHP+MET5	tBHP+MET5	tBHP+MET5	tBHP+MET10	tBHP+MET10	tBHP+MET10	tBHP+MET10
Integrin 1	1	1	1	1	2.22853	1.36938	2.14539	1.83942	1.13784	1.9048	1.66625	1.87089	0.461645	1.40505	0.941503	1.80761	0.5	0.7	0.902406	1.17173	1.26244	1.76748	2.03808	1.8894	0.589679	2.77794	0.782206	1.61526	0.796642	2.90721	0.725077	1.1805
ROCK 1/2	1	1	1	1	2.50557	2.15317	1.15151		1.86084	2.68535	1.56801		1.09658	1.65144	1.23287		0.590626	0.765618	1.1611	0.394	2.37095	1.50858	1.13647	0.386748	0.97697	1.5187	0.920967	0.311468	0.898814	0.940237	0.795661	0.233612
AMPK	1	1	1	1	1.8114	1.12598	1.12902		2.0531	1.41519			1.22241	1.20545			0.8	0.808044			1.48018	0.969559			0.643379	1.08014			1.05452	0.570351
pAMPK	1	1	1	1	2.1177	1.97088	1.43262		1.80659	3.46026	2.24957		1.41585	2.05906	2.19317		0.8	0.429451	1.21014		1.81945	1.91779		1.61947	1.38678	1.52799	1.58529		1.56822	1.2183	1.64499
MLC 1	1	1	1	1	1.10497	0.891299	0.690677	0.752014	1.55265	0.752936	1.15743	0.596709	1.02514	0.701631	1.29158	0.504438	0.939811	1.08254	1.77939	0.802497	3.09102	1.09622	2.64801	0.974625	1.62583	1.11677	1.71303	0.686616	1.38189	1.33784	1.45074	0.469949
F-actin	1	1	1	1	1.13714	1.83625	1.58488	0.872557	2.29878	1.42796	1.74236	0.961194	3.68567	1.03458	1.01588	0.904187	0.6	0.7	1.11814	0.75149	4.19418	1.51008	1.20824	0.956849	1.02634	1.02677	1.13366	0.631257	0.765285	0.775655	1.01441	0.656215
