# Supplementary material for: Metformin protects trabecular meshwork against oxidative injury via activating integrin/ROCK signals
Source: eLife journal article supplement (doi:10.7554/elife.81198), 2022-12-12

Figure 5-source data2 integrin


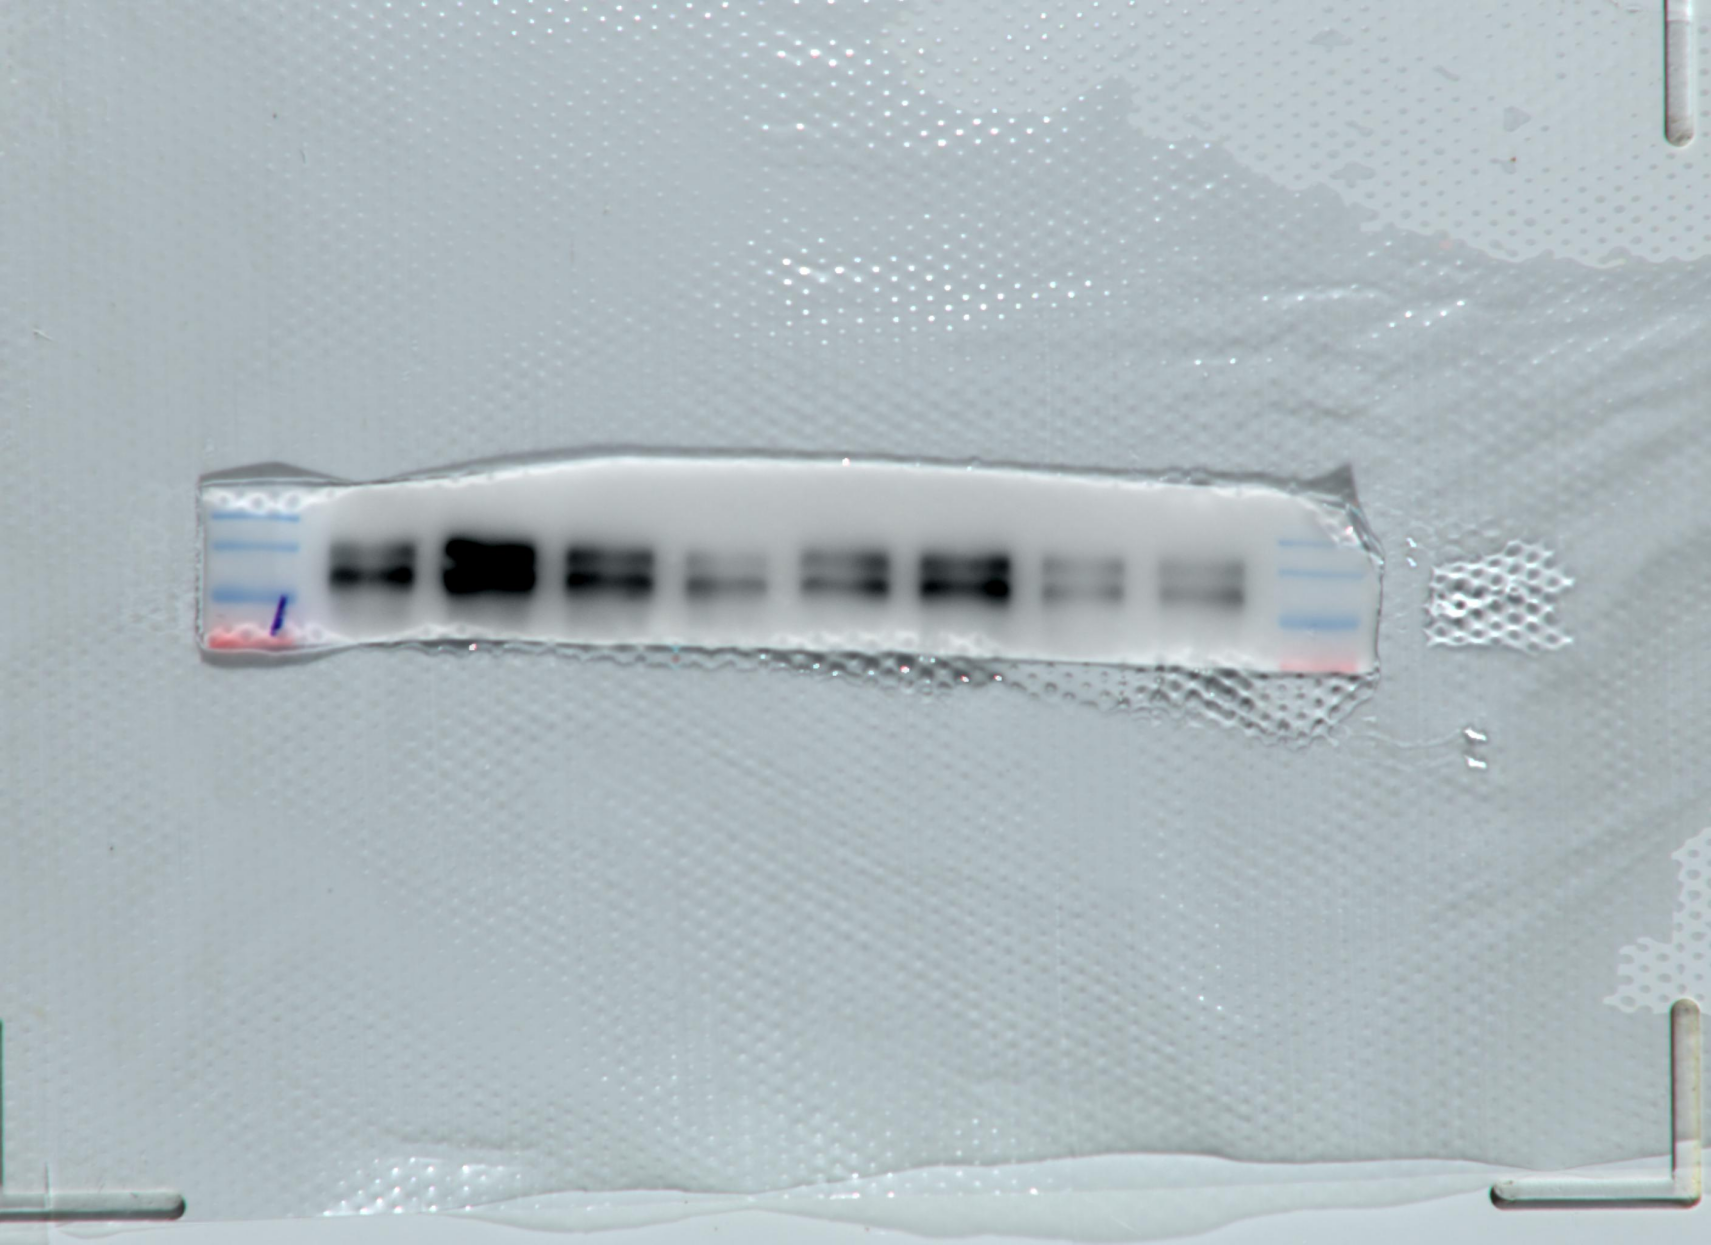


Figure 5-source data3 ROCK 1/2


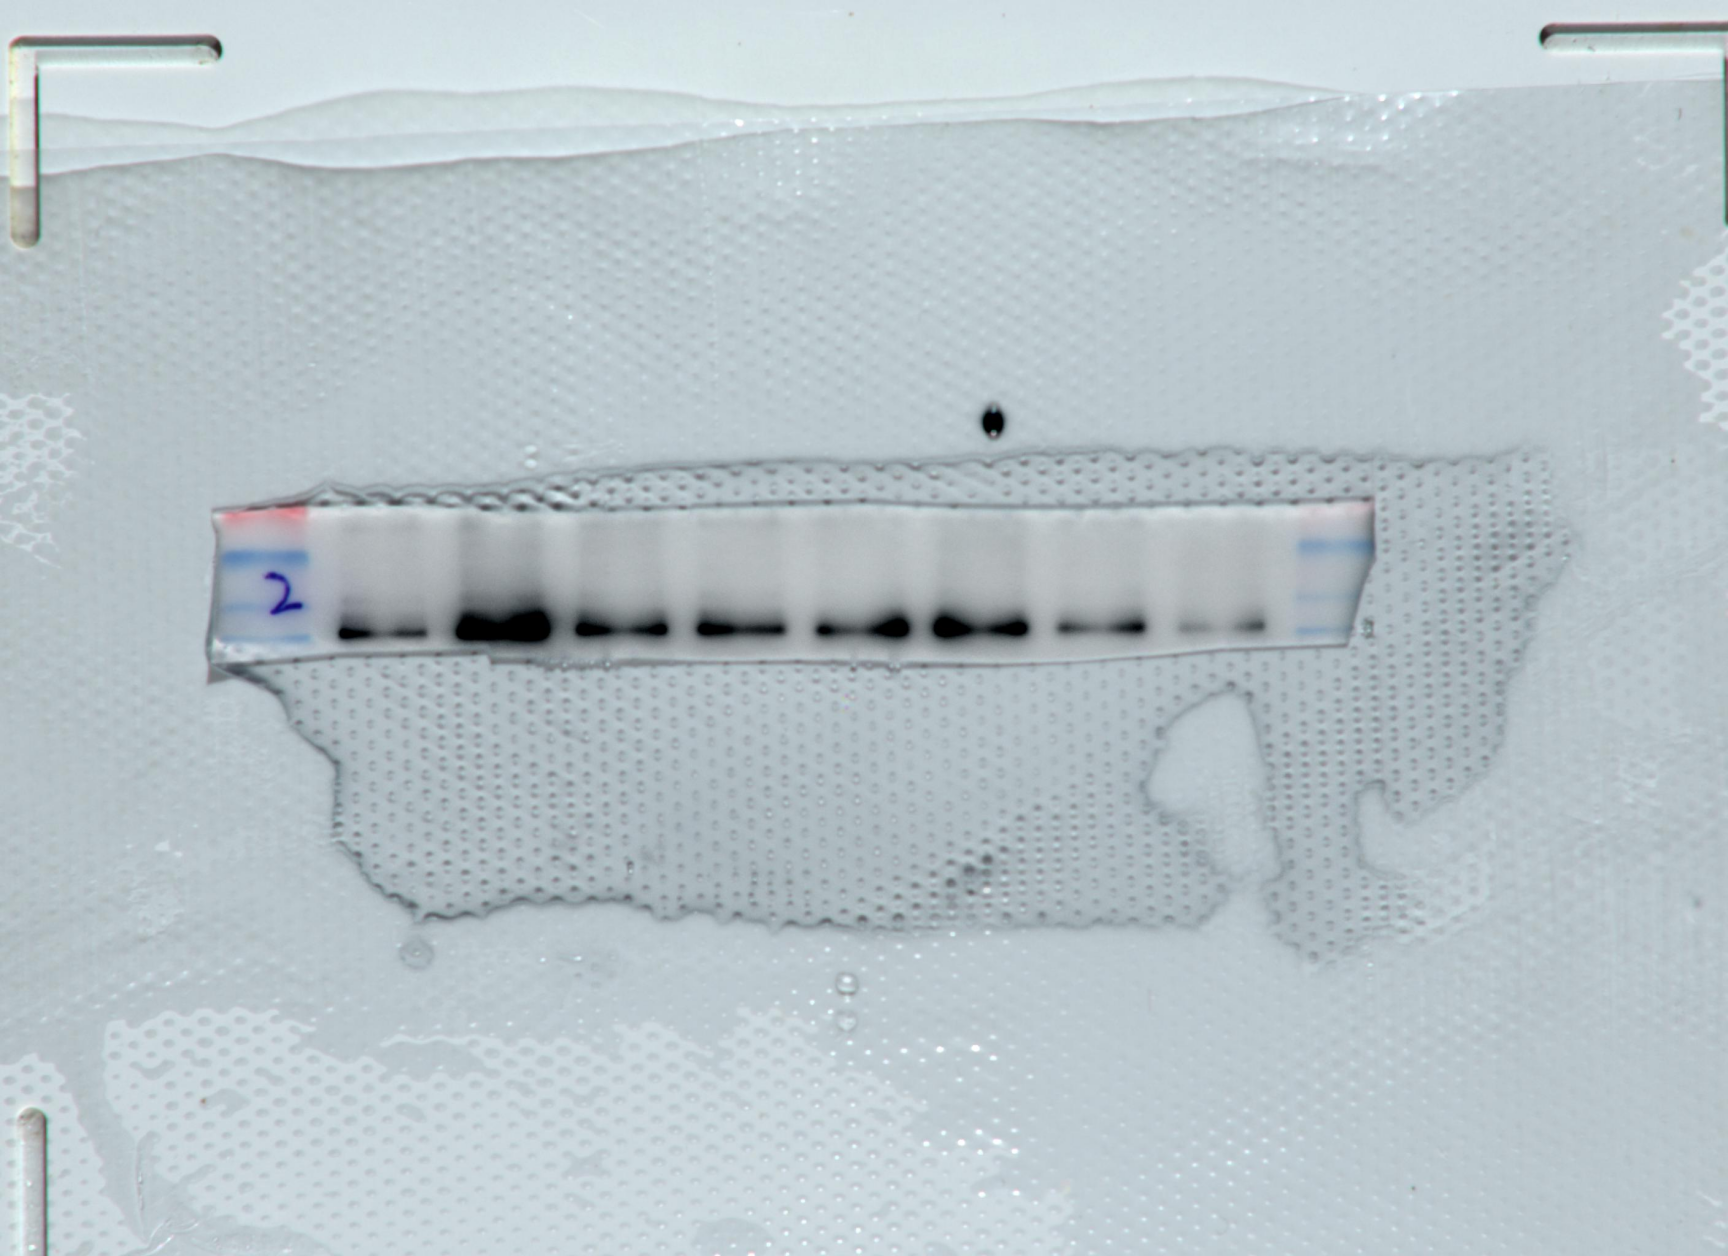


Figure 5-source data4 AMPK


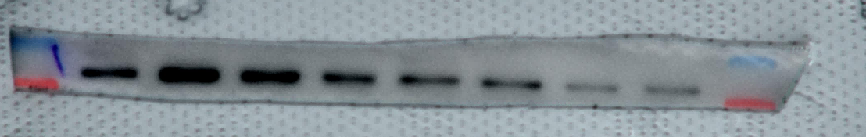


Figure 5-source data5 pAMPK


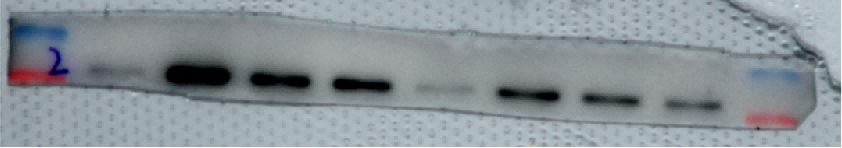


Figure 5-source data6 MLC 1


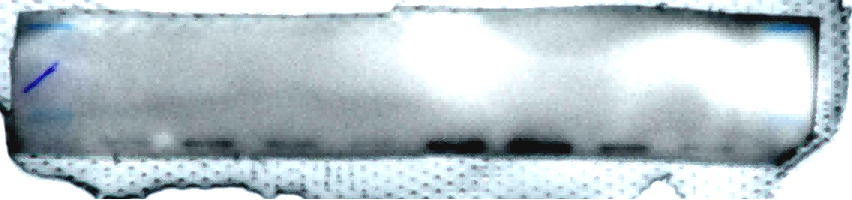


Figure 5-source data7 F-actin


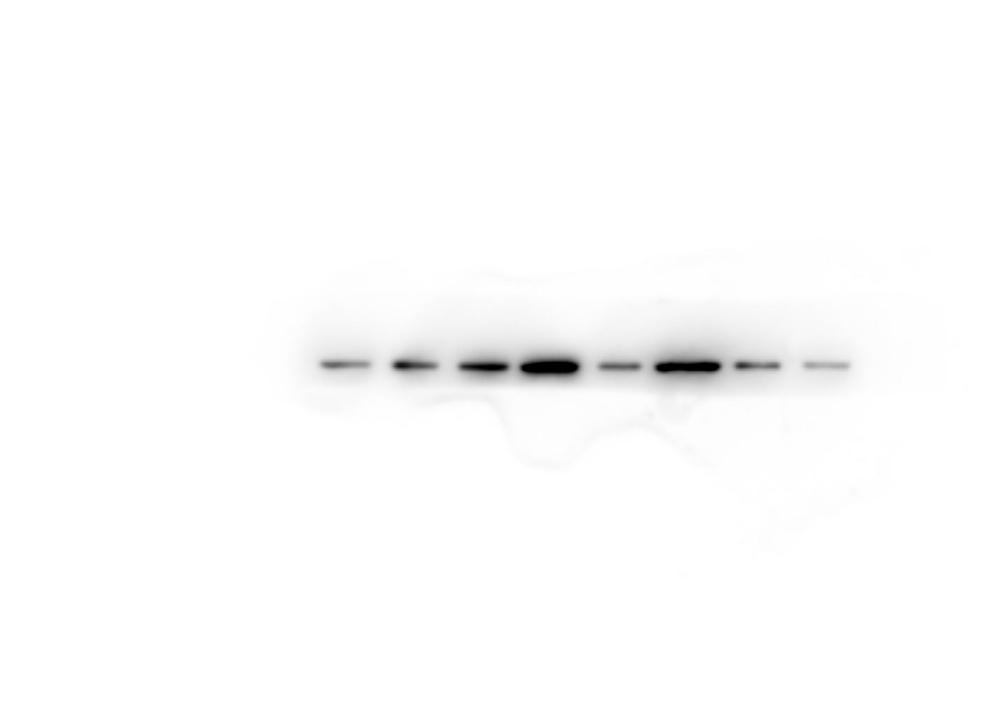


Figure 5-source data8 β-actin


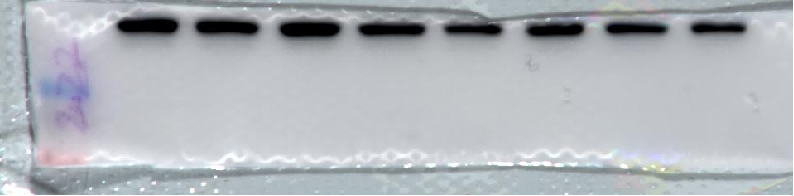

Supplement: data1 [file Figure5-source data9.docx]
