# Supplementary material for: Metformin protects trabecular meshwork against oxidative injury via activating integrin/ROCK signals
Source: eLife journal article supplement (doi:10.7554/elife.81198), 2022-12-12
Supplement: data1 [file Figure6-source data1.xlsx]

## Sheet: Sheet1
Microfilaments (n)
CON	MET3	MET5	MET10	tBHP	tBHP+MET3	tBHP+MET5	tBHP+MET10
52	64	17	38	16	48	52	64
40	50	51	41	18	39	43	66
29	32	22	58	16	29	50	45
32	46	56	46	21	30	42	46
81	52	54	64	20	32	29	40
