# Supplementary figures and images for: Metformin protects trabecular meshwork against oxidative injury via activating integrin/ROCK signals
Source: eLife journal article supplement (doi:10.7554/elife.81198), 2022-12-12

Figure 4-source data3 myocilin

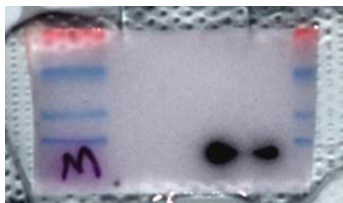

Figure 4-source data4  $\beta$ -actin

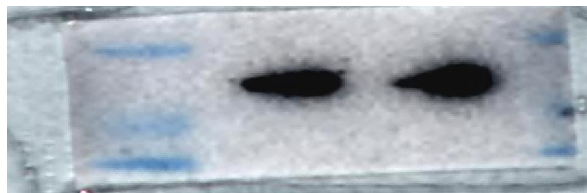

Supplement: data1 [file elife-81198-data1-v1.zip]

Figure 4-source data3 myocilin


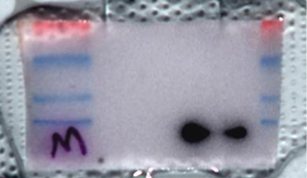


Figure 4-source data4 β-actin


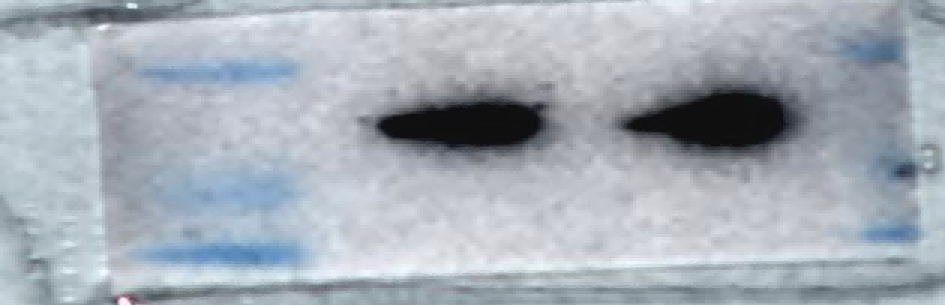

Supplement: data1 [file Figure4-source data5.docx]
